# Supplementary material for: Construction of Predictive Models for Interstitial Lung Disease Risk in Sjögren’s Syndrome via Multiple Machine Learning Algorithms
Source: Research Square preprint supplement (doi:10.21203/rs.3.rs-8657816/v1), 2026-02-03
Supplement: Supplementary file 1 [file 3332fc92c2281cae11e780bd.xlsx]

## Sheet: Model Performance
Table 2A. Model Performance Metrics - Training Set
Model	AUC	AUC_95%CI	Accuracy	Accuracy_95%CI	Precision	Recall	F1_Score
Random Forest	0.907	0.855-0.948	0.781	0.708-0.854	0.745	0.691	0.717
Logistic Regression	0.825	0.749-0.892	0.715	0.642-0.788	0.690	0.527	0.598
XGBoost	0.879	0.819-0.927	0.752	0.679-0.825	0.706	0.655	0.679
KNN	0.760	0.676-0.834	0.672	0.591-0.745	0.609	0.509	0.554
SVM	0.803	0.728-0.872	0.708	0.635-0.781	0.759	0.400	0.524
Decision Tree	0.844	0.781-0.897	0.766	0.693-0.839	0.848	0.509	0.636
ElasticNet	0.765	0.684-0.839	0.723	0.650-0.796	0.718	0.509	0.596
Table 2B. Model Performance Metrics - Validation Set
Model	AUC	AUC_95%CI	Accuracy	Accuracy_95%CI	Precision	Recall	F1_Score
Random Forest	0.830	0.725-0.934	0.780	0.678-0.881	0.720	0.750	0.735
Logistic Regression	0.811	0.689-0.914	0.678	0.542-0.797	0.609	0.583	0.596
XGBoost	0.807	0.689-0.908	0.780	0.678-0.881	0.690	0.833	0.755
KNN	0.727	0.595-0.842	0.627	0.508-0.746	0.550	0.458	0.500
SVM	0.721	0.583-0.848	0.593	0.441-0.695	0.500	0.250	0.333
Decision Tree	0.649	0.526-0.790	0.644	0.525-0.763	0.667	0.250	0.364
ElasticNet	0.606	0.455-0.745	0.559	0.424-0.678	0.450	0.375	0.409
