# Supplementary material for: Construction of Predictive Models for Interstitial Lung Disease Risk in Sjögren’s Syndrome via Multiple Machine Learning Algorithms
Source: Research Square preprint supplement (doi:10.21203/rs.3.rs-8657816/v1), 2026-02-03
Supplement: Supplementary file 2 [file b8665dea9828bb5f5aff0143.xlsx]

## Sheet: Clinical Characteristics
Clinical Characteristics of Sjögren's Syndrome Patients
Factors	All (n=196)	Training set (n=137)	Validation set (n=59)	P value
Demographic Characteristics
Age (years)	59.0 (52.8, 65.0)	60.0 (53.0, 66.0)	59.0 (51.5, 64.5)	0.635
Female	184 (93.88)	128 (93.43)	56 (94.92)	0.942
Main Symptoms
Dry mouth	89 (45.41)	64 (46.72)	25 (42.37)	0.686
Dry eye	82 (41.84)	57 (41.61)	25 (42.37)	1.000
Laboratory Tests - Antibodies
Rheumatoid Factor	100 (51.02)	69 (50.36)	31 (52.54)	0.901
Anti-SSA	97 (49.49)	66 (48.18)	31 (52.54)	0.685
Anti-SSB	97 (49.49)	66 (48.18)	31 (52.54)	0.685
Anti-CCP	77 (39.29)	53 (38.69)	24 (40.68)	0.918
ESR	104 (53.06)	74 (54.01)	30 (50.85)	0.801
CRP	76 (38.78)	55 (40.15)	21 (35.59)	0.660
IgG	105 (53.57)	74 (54.01)	31 (52.54)	0.973
IgA	105 (53.57)	74 (54.01)	31 (52.54)	0.973
IgM	105 (53.57)	74 (54.01)	31 (52.54)	0.973
C3	100 (51.02)	70 (51.09)	30 (50.85)	1.000
C4	100 (51.02)	70 (51.09)	30 (50.85)	1.000
Anti-dsDNA	97 (49.49)	66 (48.18)	31 (52.54)	0.685
Anti-Sm	97 (49.49)	66 (48.18)	31 (52.54)	0.685
Anti-Scl-70	97 (49.49)	66 (48.18)	31 (52.54)	0.685
Anti-Jo-1	97 (49.49)	66 (48.18)	31 (52.54)	0.685
ALT	108 (55.10)	77 (56.20)	31 (52.54)	0.752
AST	107 (54.59)	77 (56.20)	30 (50.85)	0.593
Imaging Studies (CT Findings)
CT ground glass opacity	55 (28.06)	40 (29.20)	15 (25.42)	0.714
CT pulmonary nodules	134 (68.37)	96 (70.07)	38 (64.41)	0.539
CT consolidation	2 (1.02)	2 (1.46)	0 (0.00)	0.874
CT bronchiectasis	8 (4.08)	7 (5.11)	1 (1.69)	0.475
CT pleural thickening	112 (57.14)	79 (57.66)	33 (55.93)	0.946
CT reticulation	8 (4.08)	7 (5.11)	1 (1.69)	0.475
CT pleural effusion	142 (72.45)	101 (73.72)	41 (69.49)	0.664
CT lymphadenopathy	140 (71.43)	98 (71.53)	42 (71.19)	1.000
Normal CT findings	149 (76.02)	105 (76.64)	44 (74.58)	0.898
